# Supplementary material for: A rapid evaluation method for the quality consistency assessment and spectrum–effect relationship study of Xiaohuoluo Pills developed based on combined spectral and chromatography technology
Source: Royal Society of Chemistry journal article supplement (doi:10.1039/d4ay01029a), 2024-01-01
Supplement: d4ay01029a2.pdf [file d4ay01029a2.pdf]

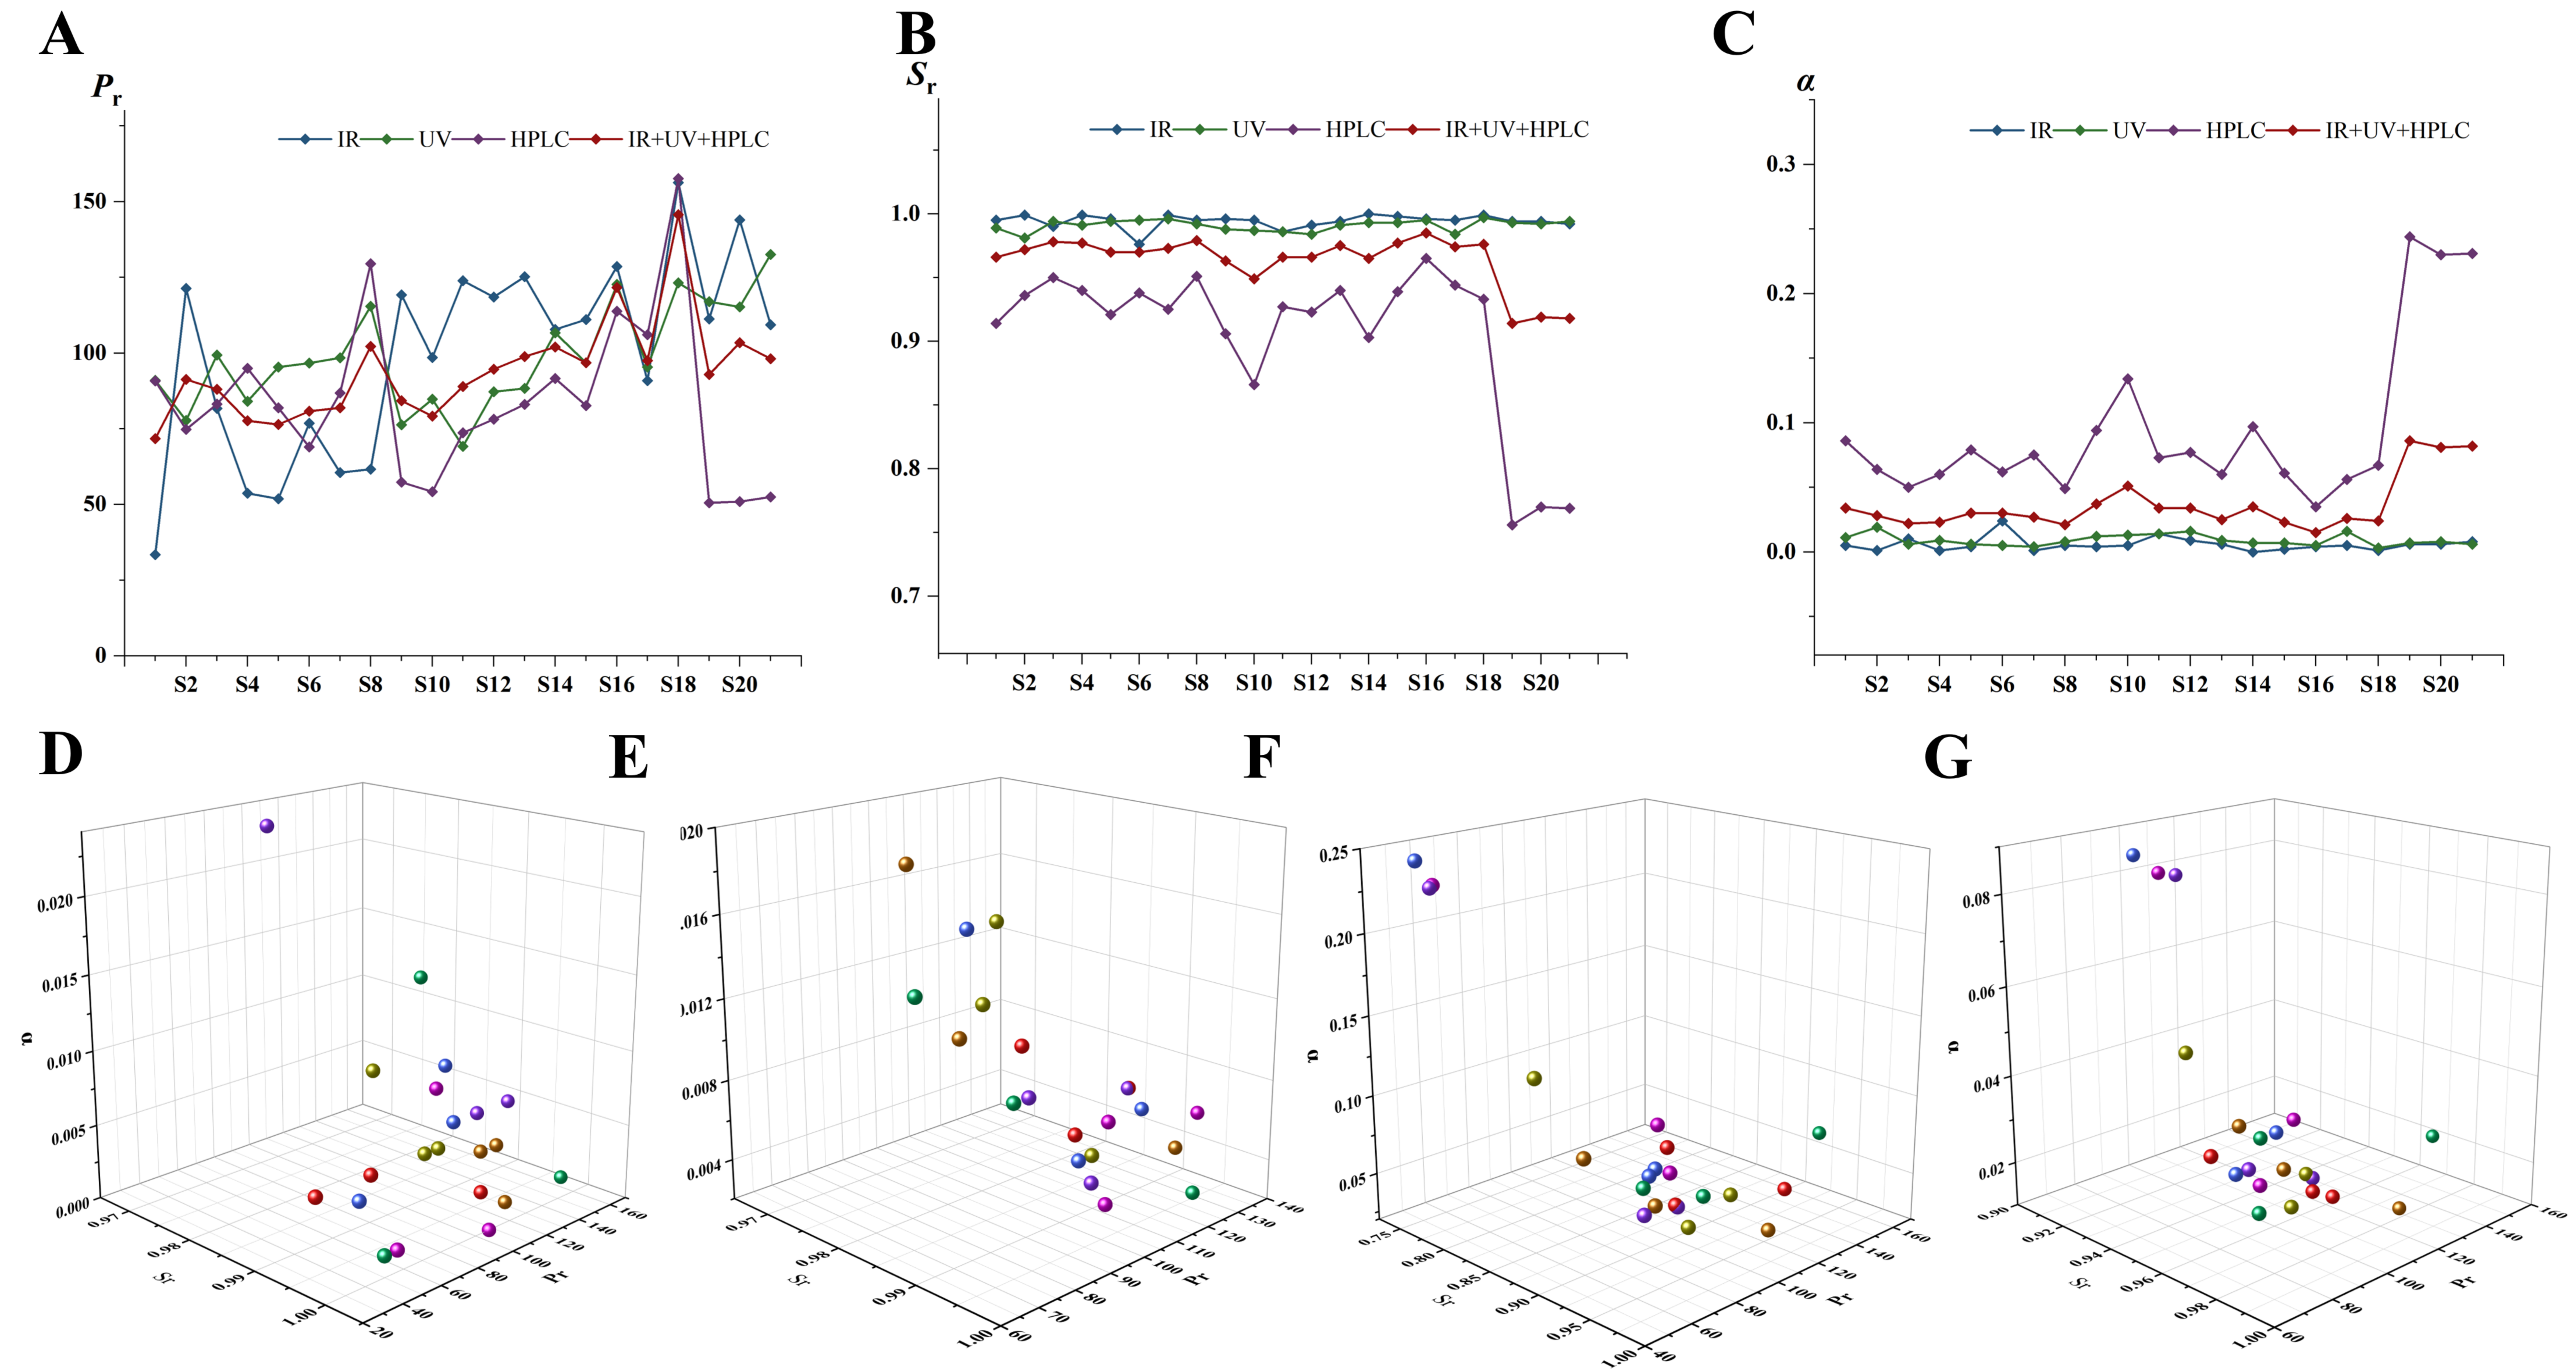

**Fig. S2.** Comparison of  $S_r$  (A),  $P_r$  (B) and  $\alpha$  (C) values of XHLPs obtained with different evaluation methods. The 3D value distribution plots of  $S_r$ ,  $P_r$  and  $\alpha$  of XHLPs obtained by FT-IR (D), UV (E), HPLC (F) and the integrated fingerprint (G) methods.
