# Supplementary material for: A rapid evaluation method for the quality consistency assessment and spectrum–effect relationship study of Xiaohuoluo Pills developed based on combined spectral and chromatography technology
Source: Royal Society of Chemistry journal article supplement (doi:10.1039/d4ay01029a), 2024-01-01
Supplement: d4ay01029a3.pdf [file d4ay01029a3.pdf]

**A**

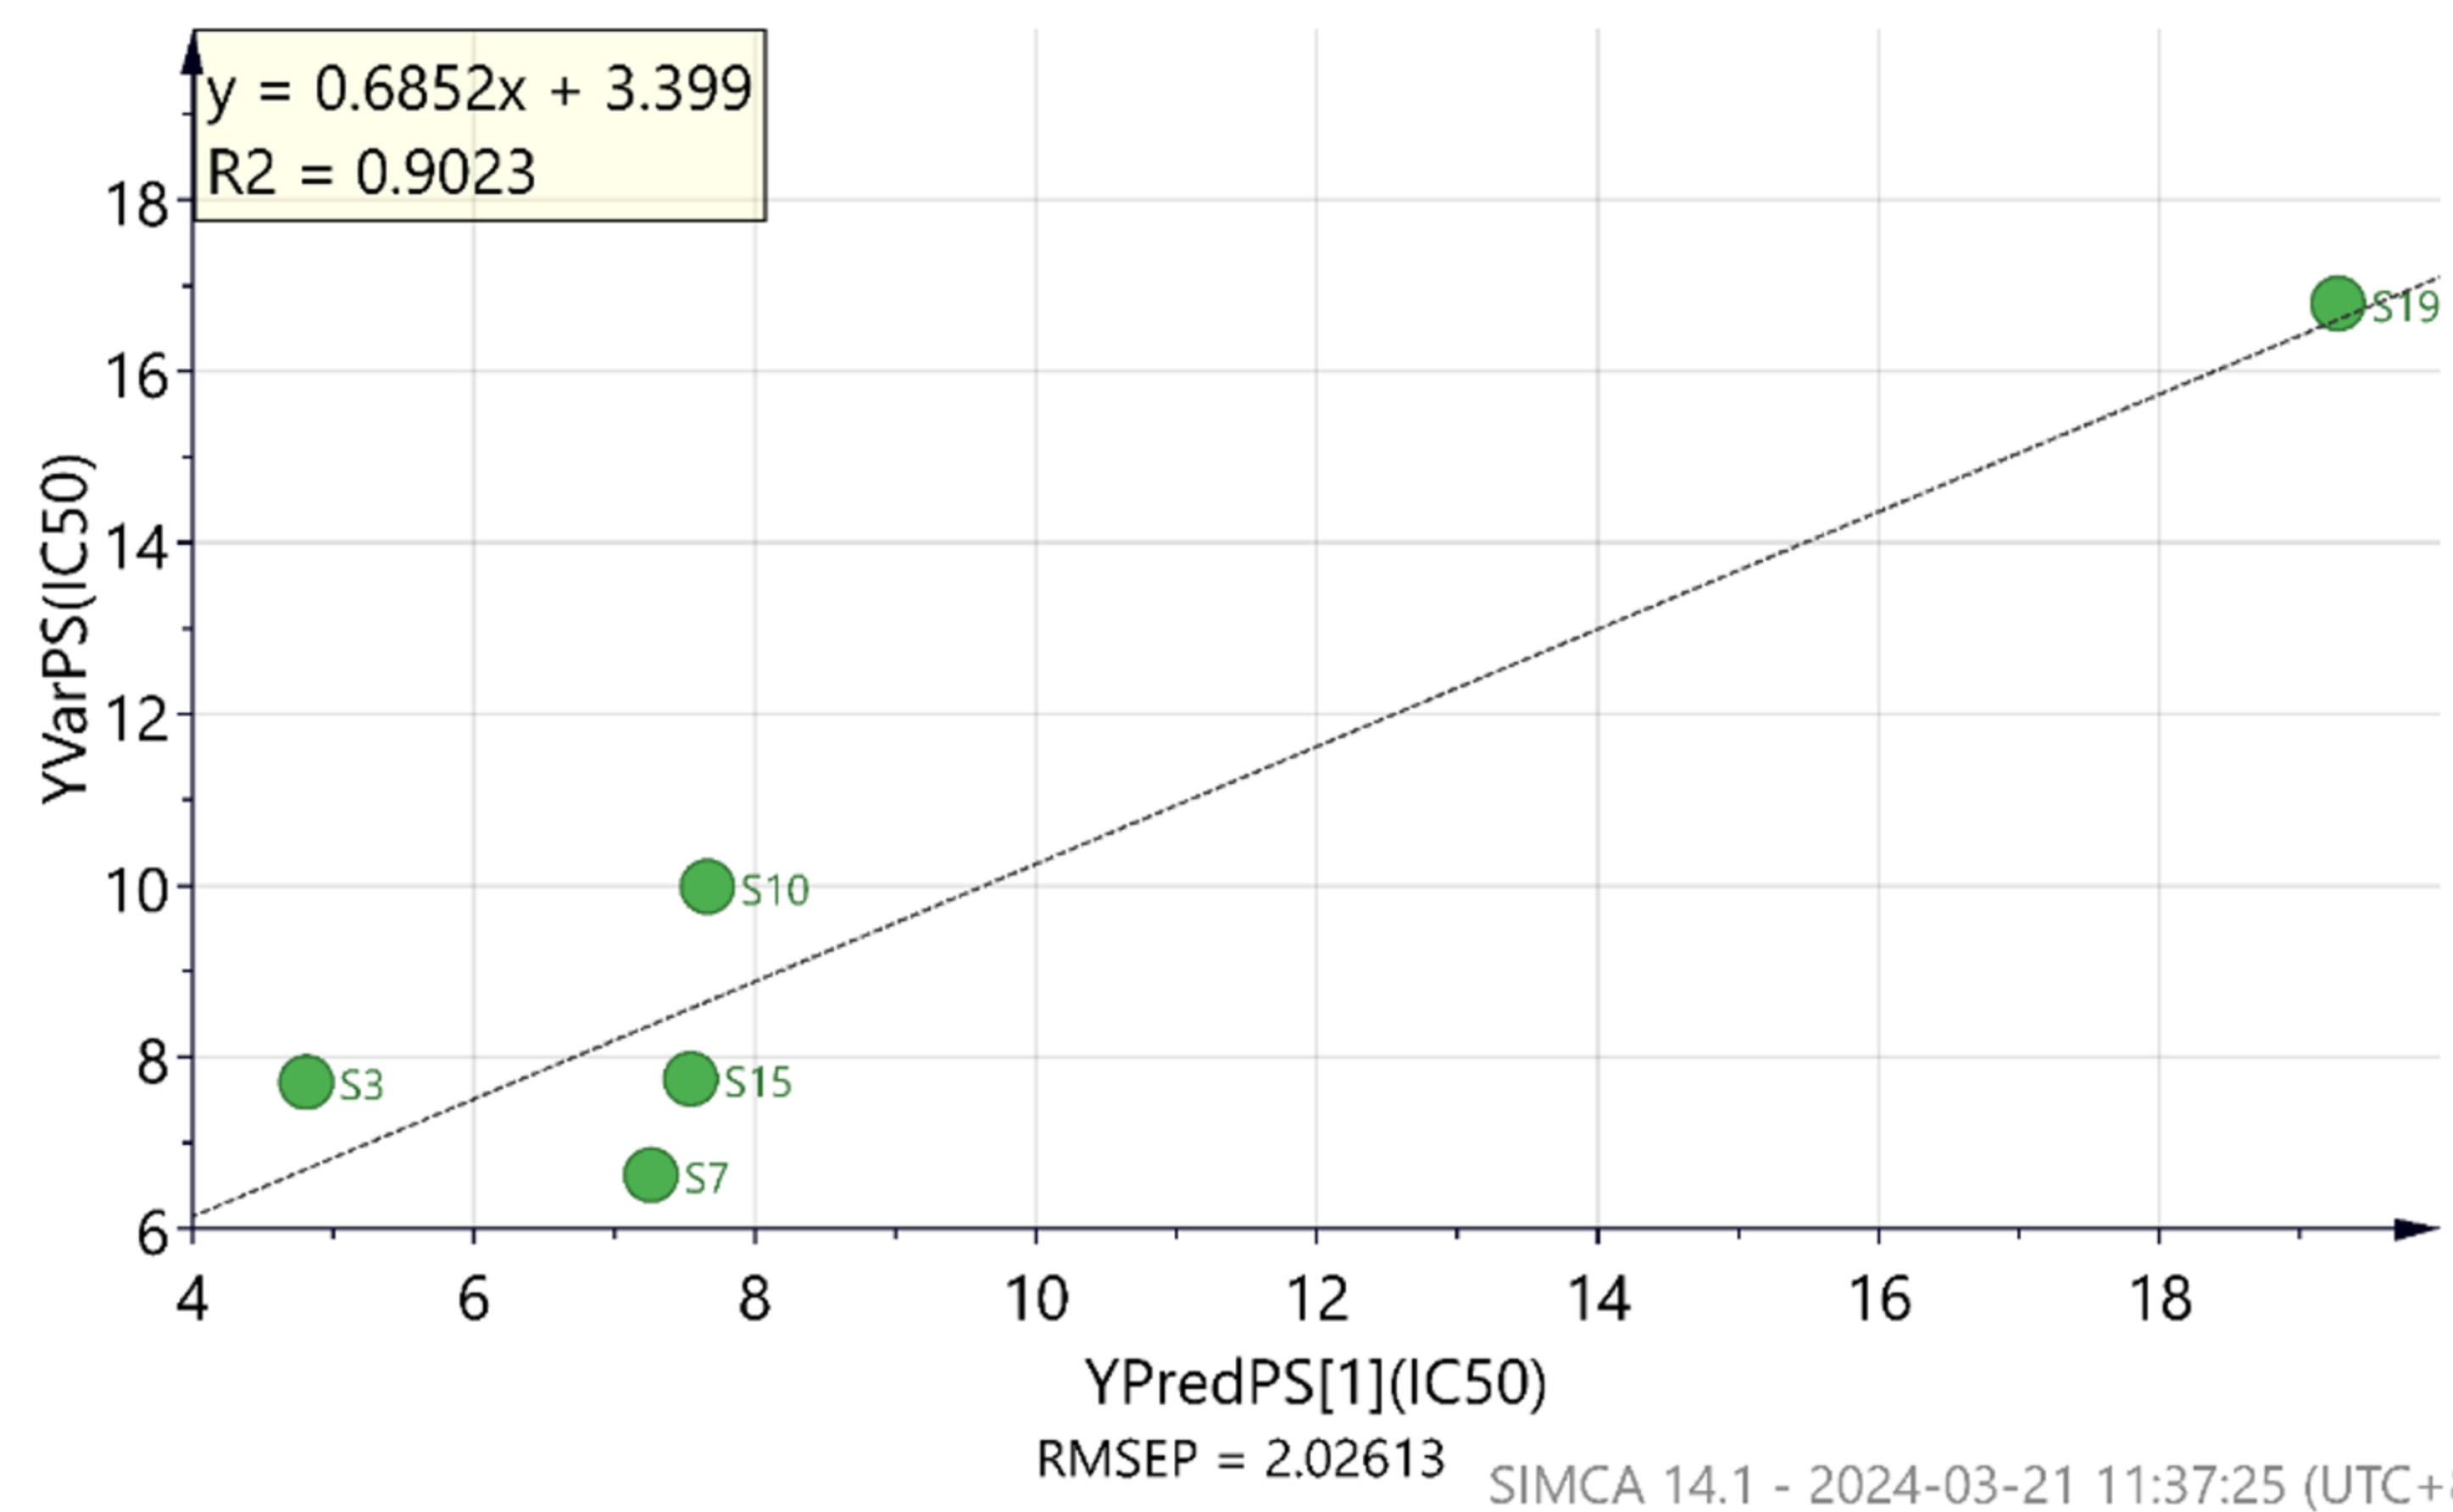

**B**

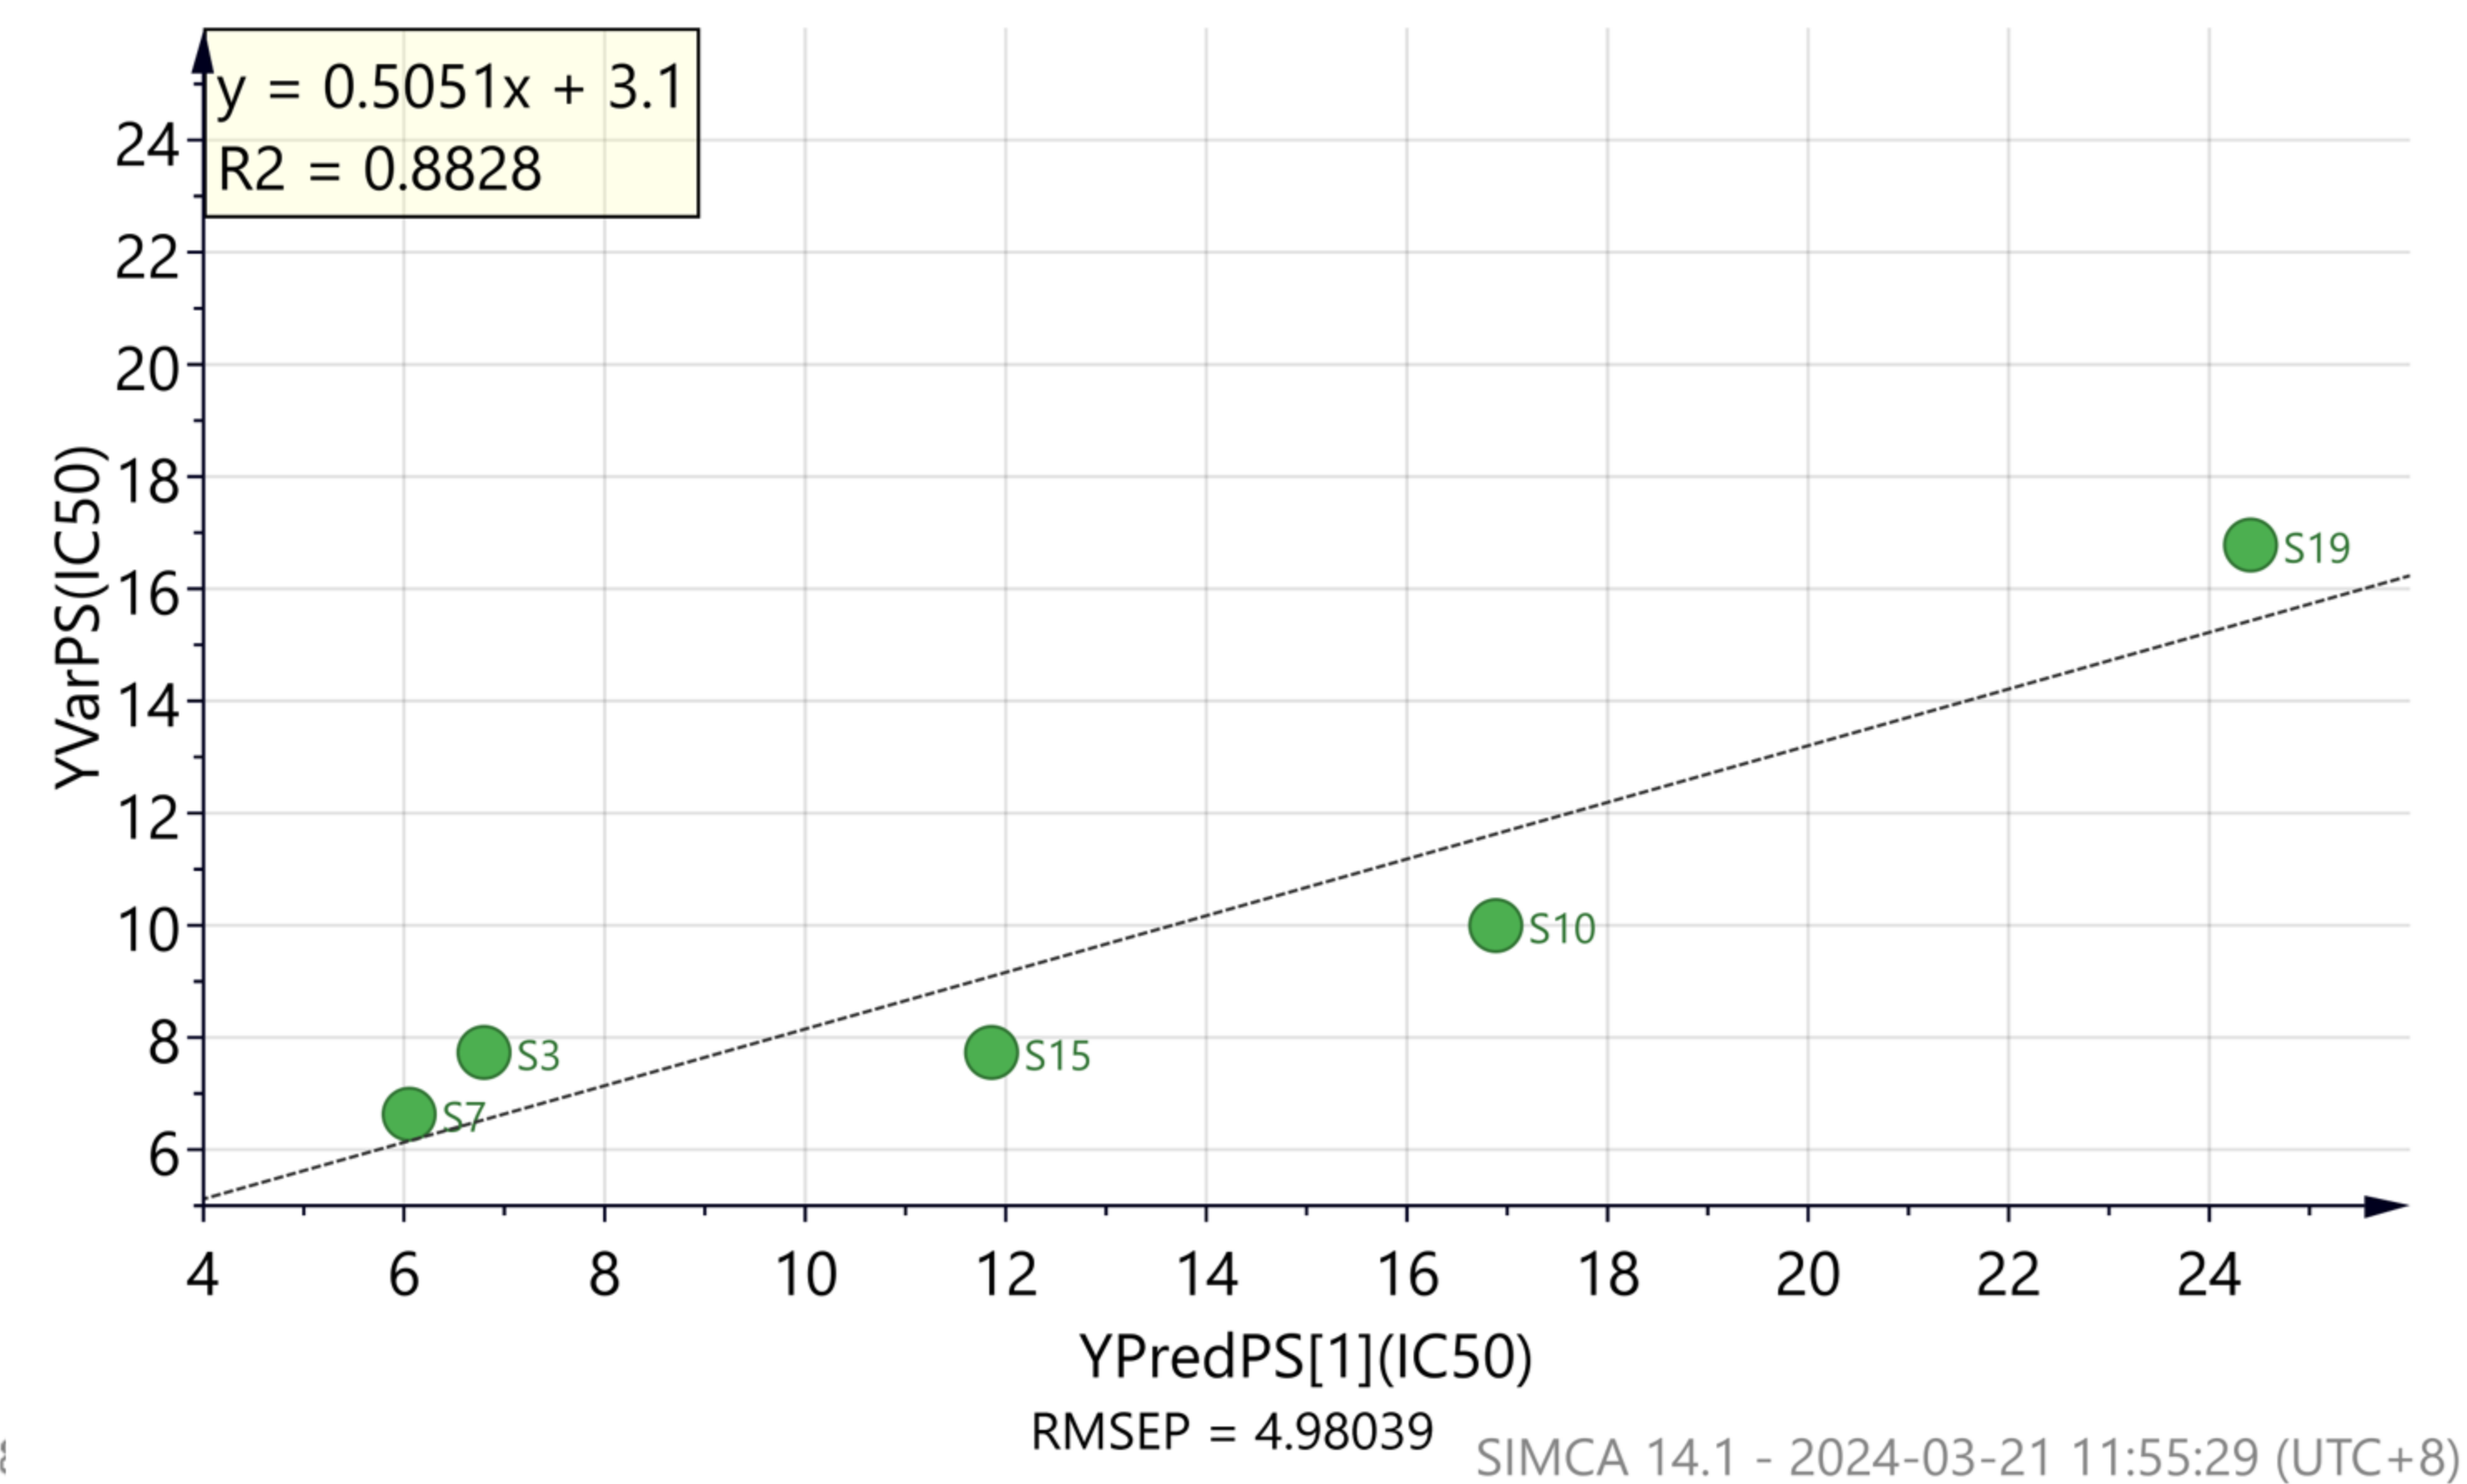

**C**

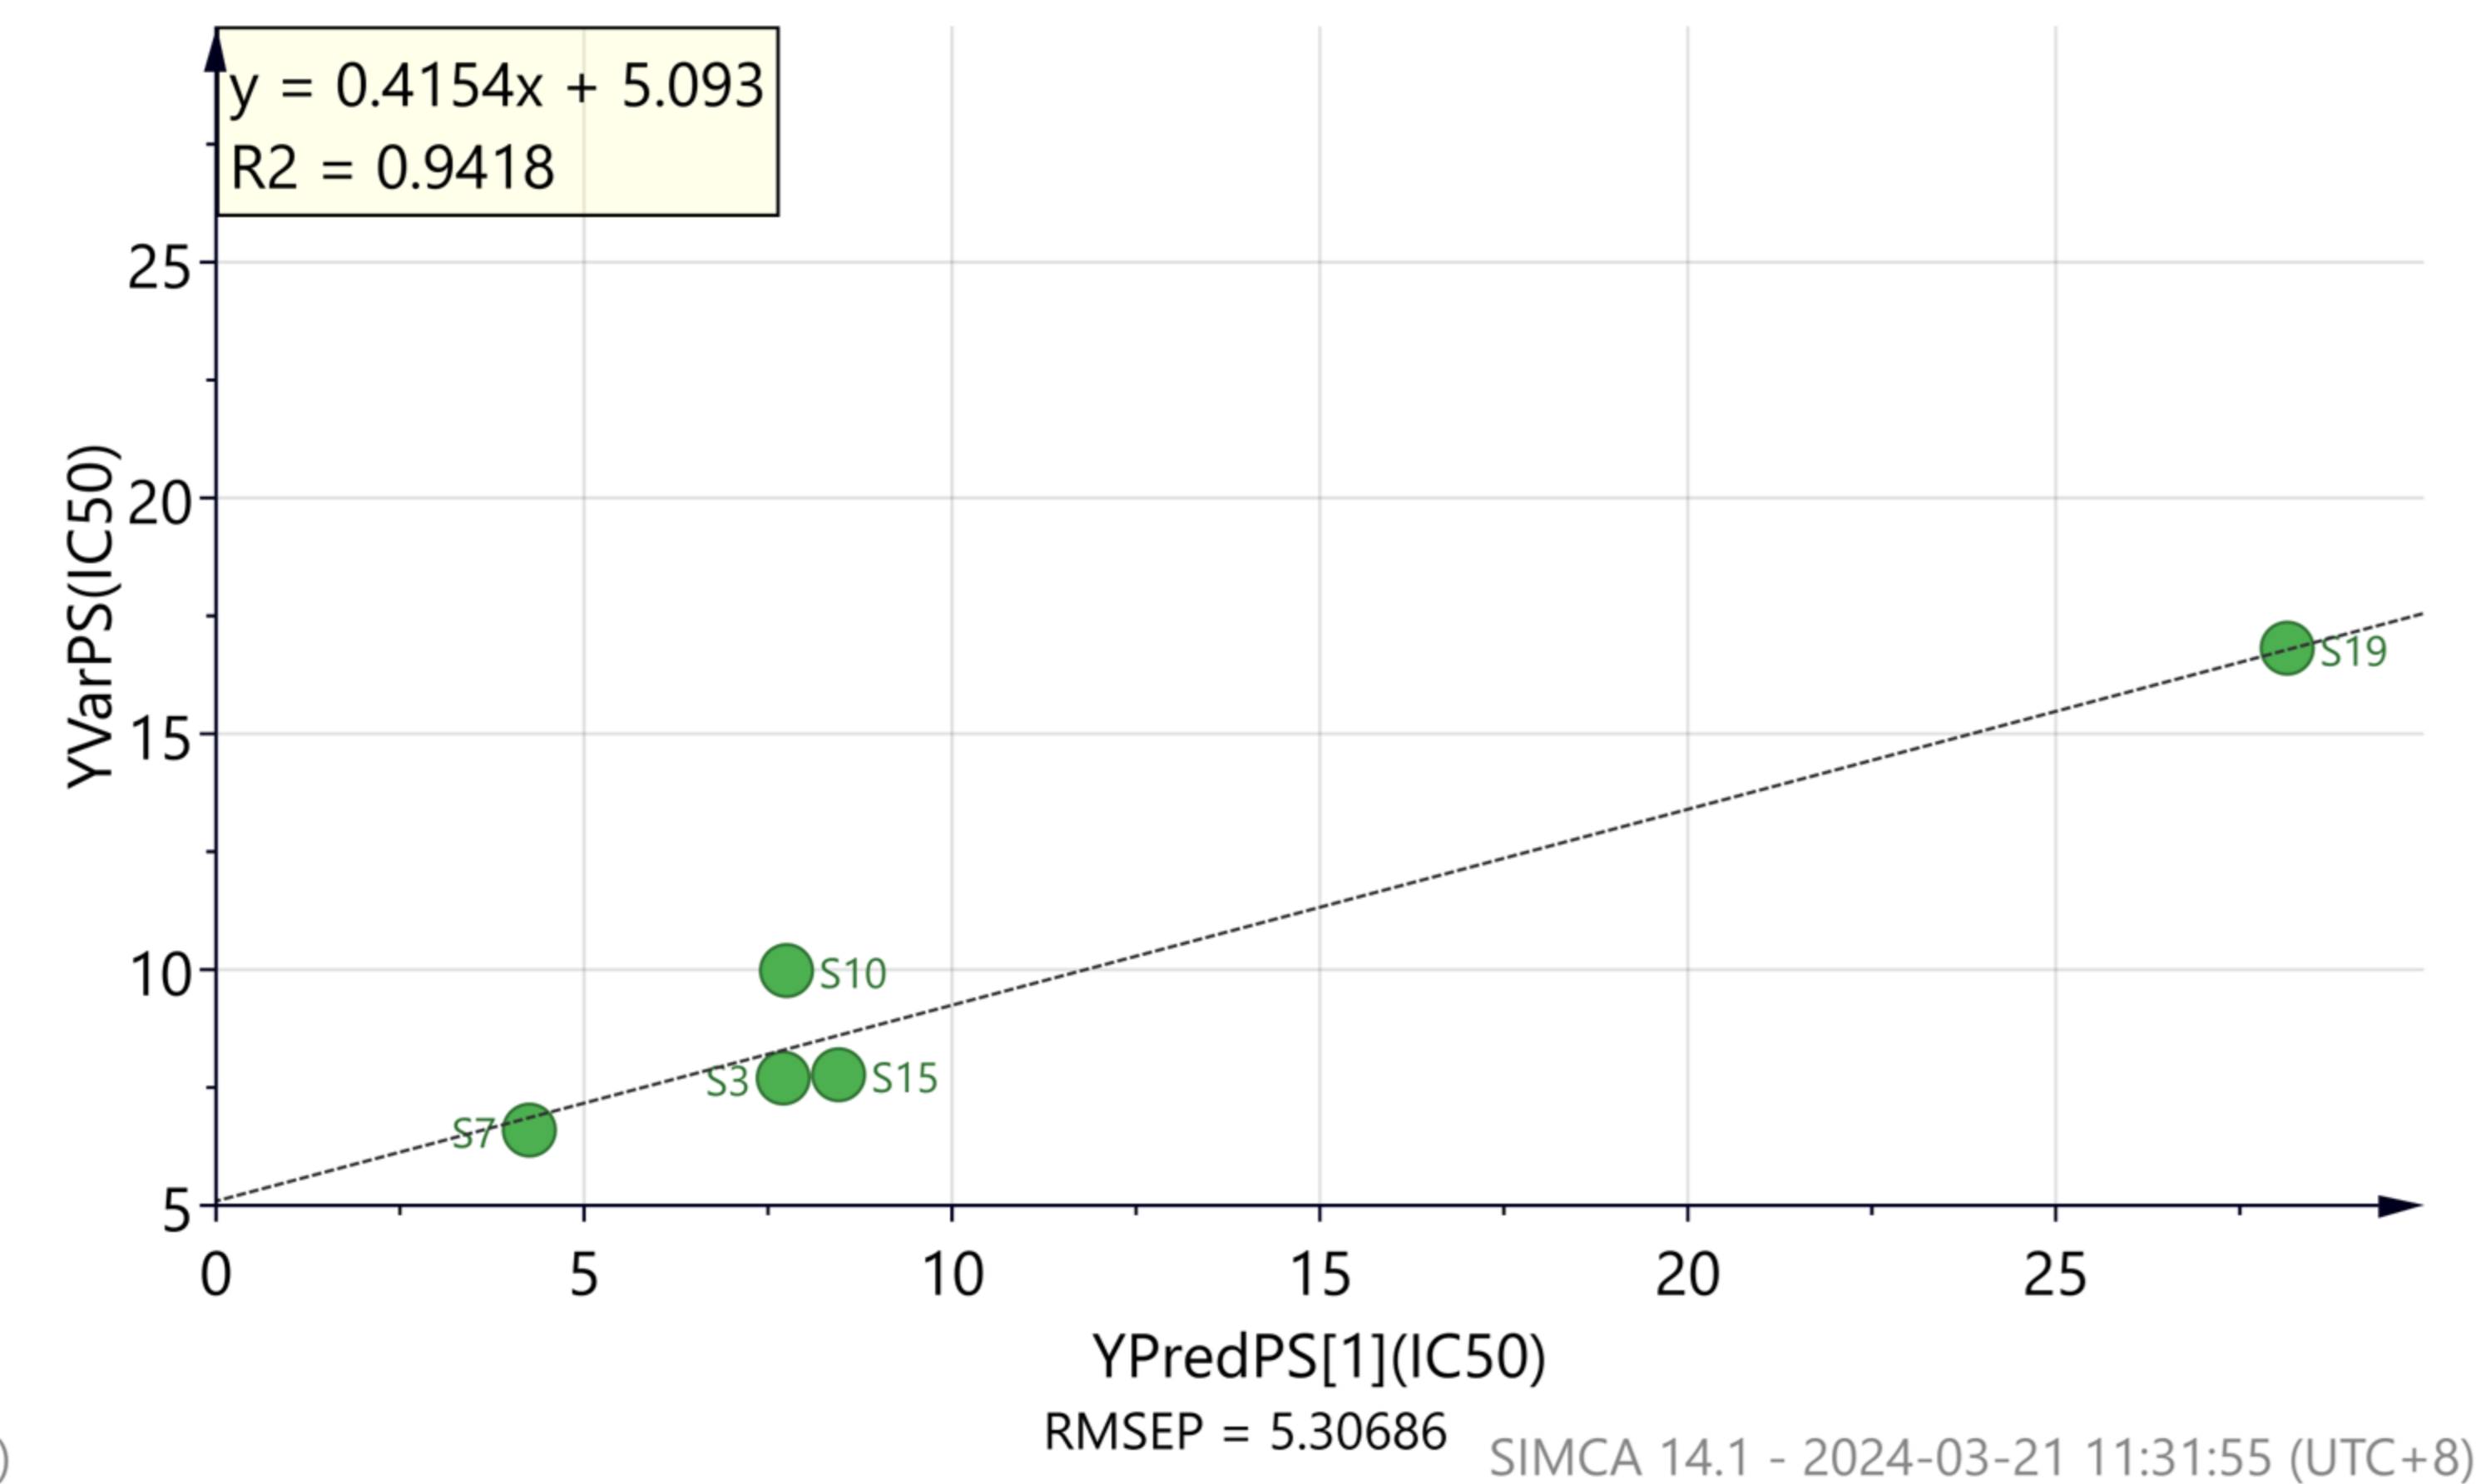

**D**

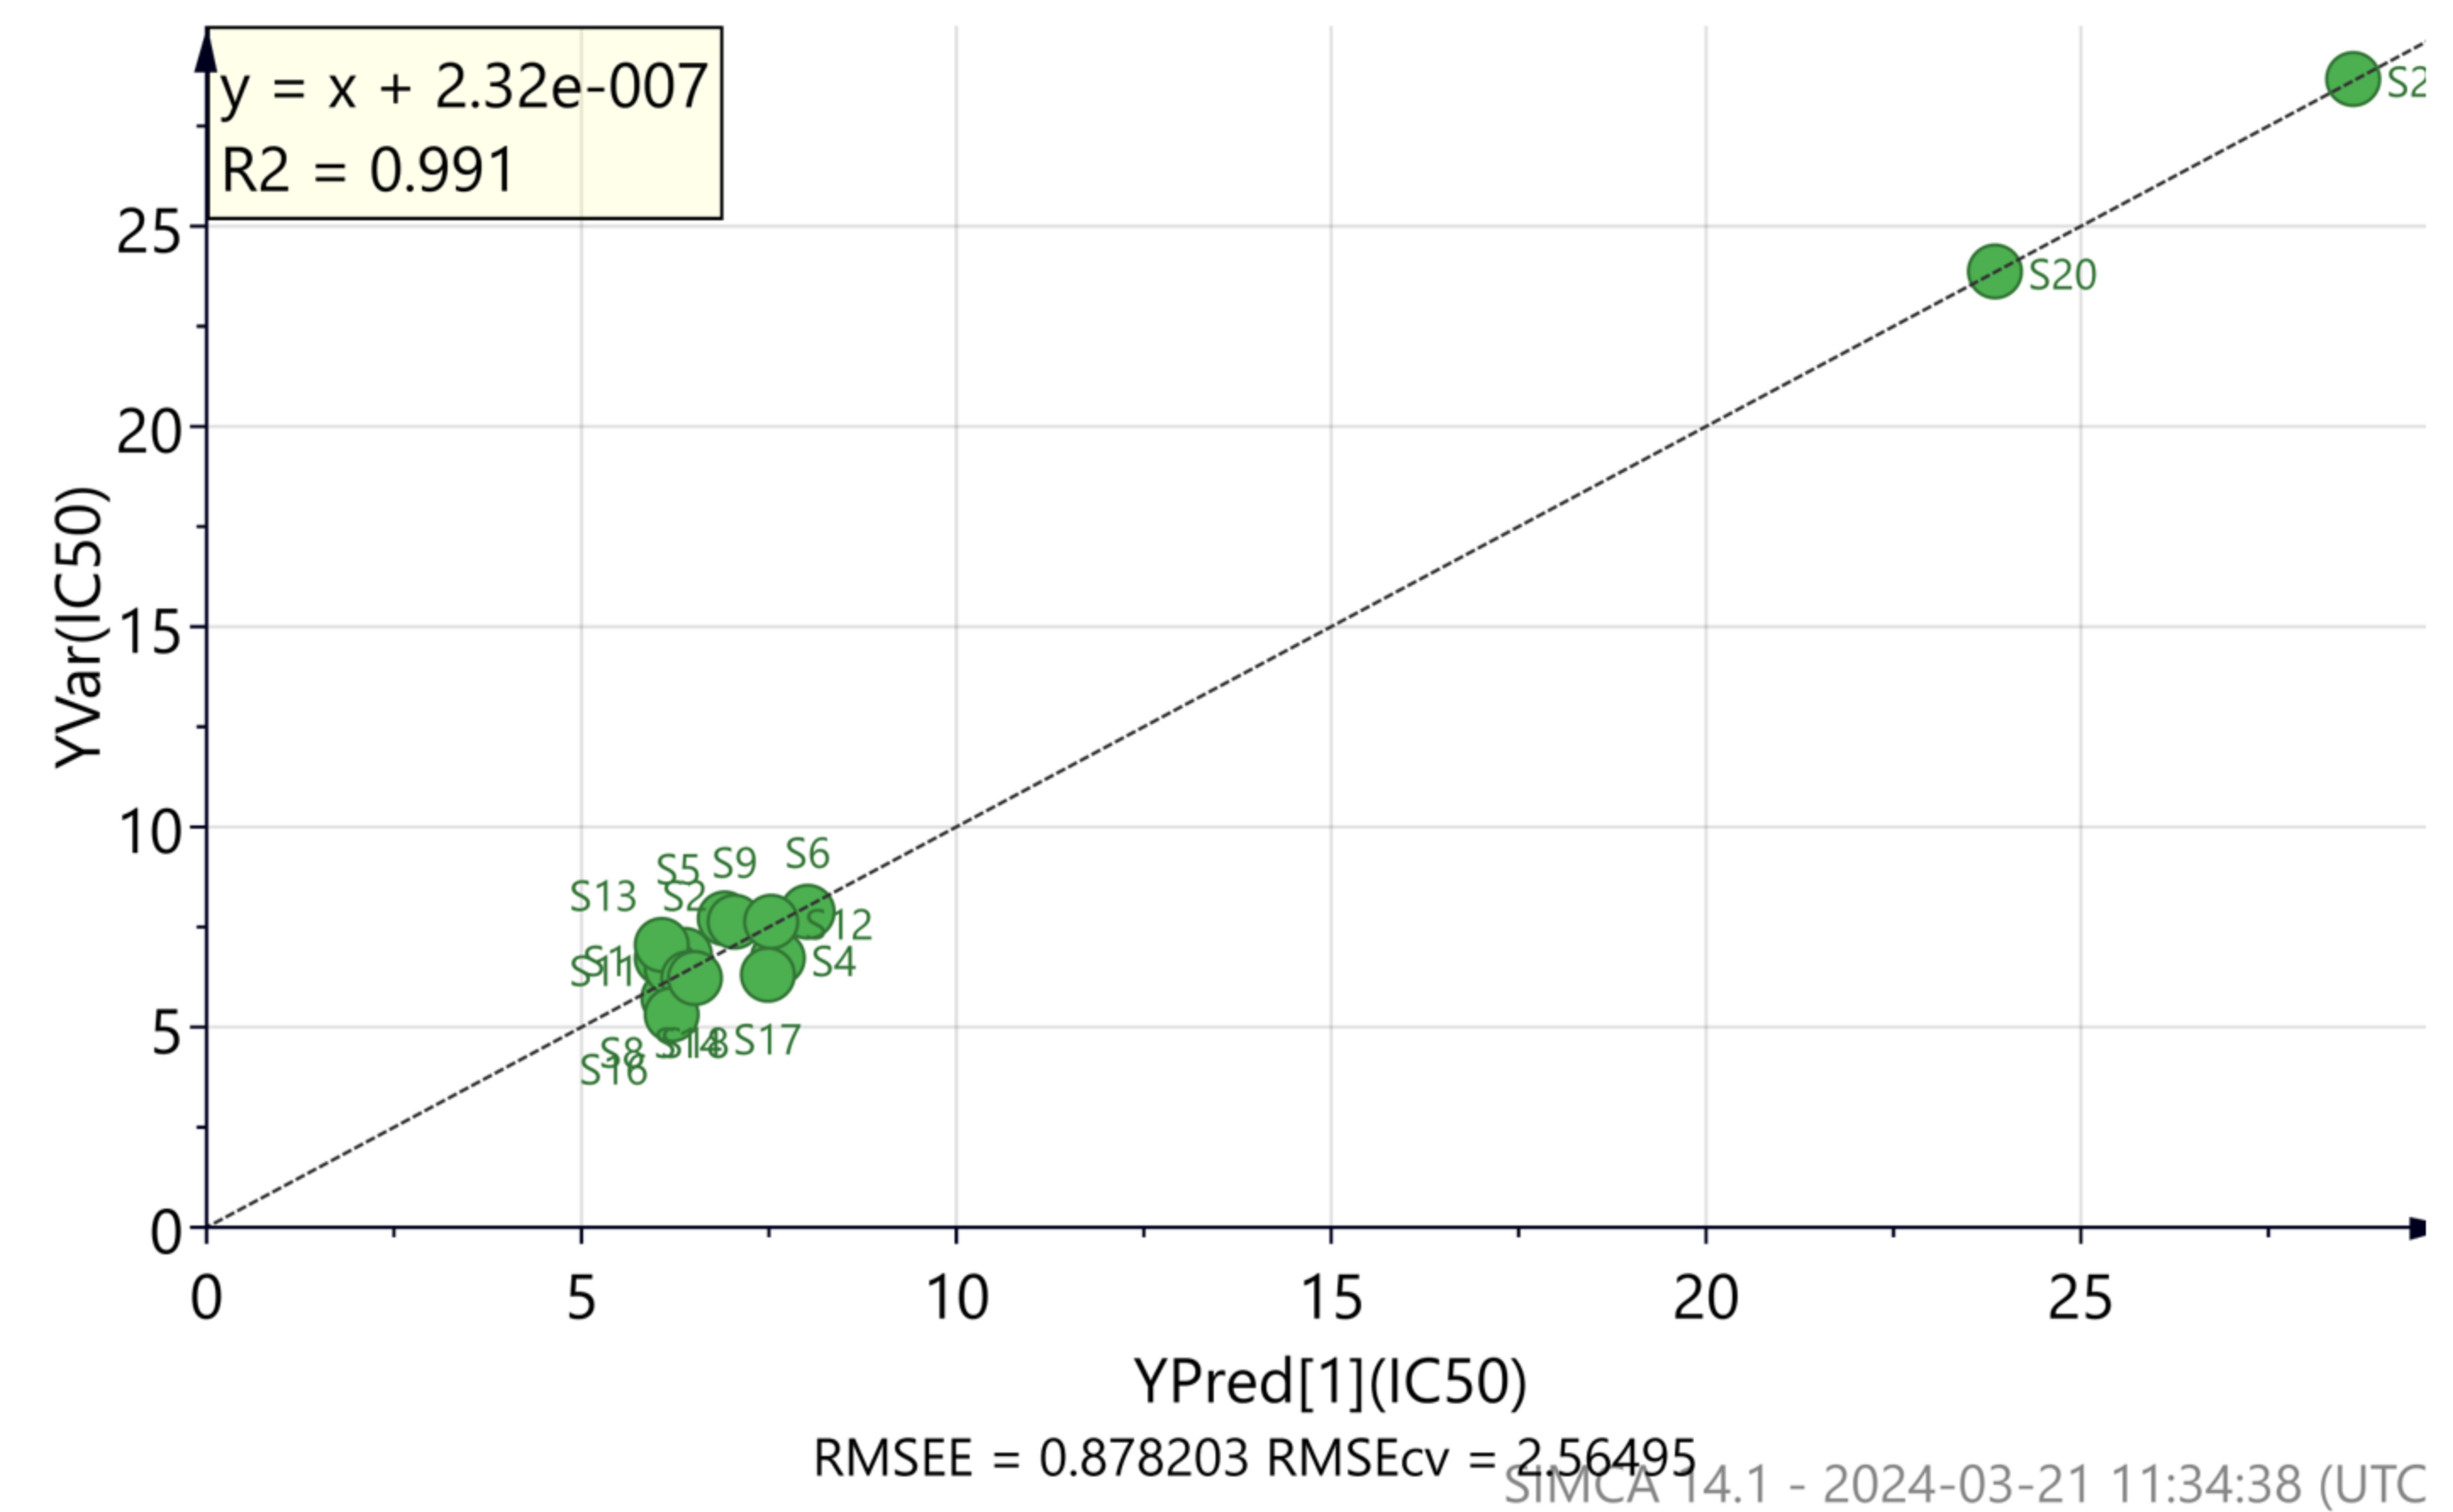

**E**

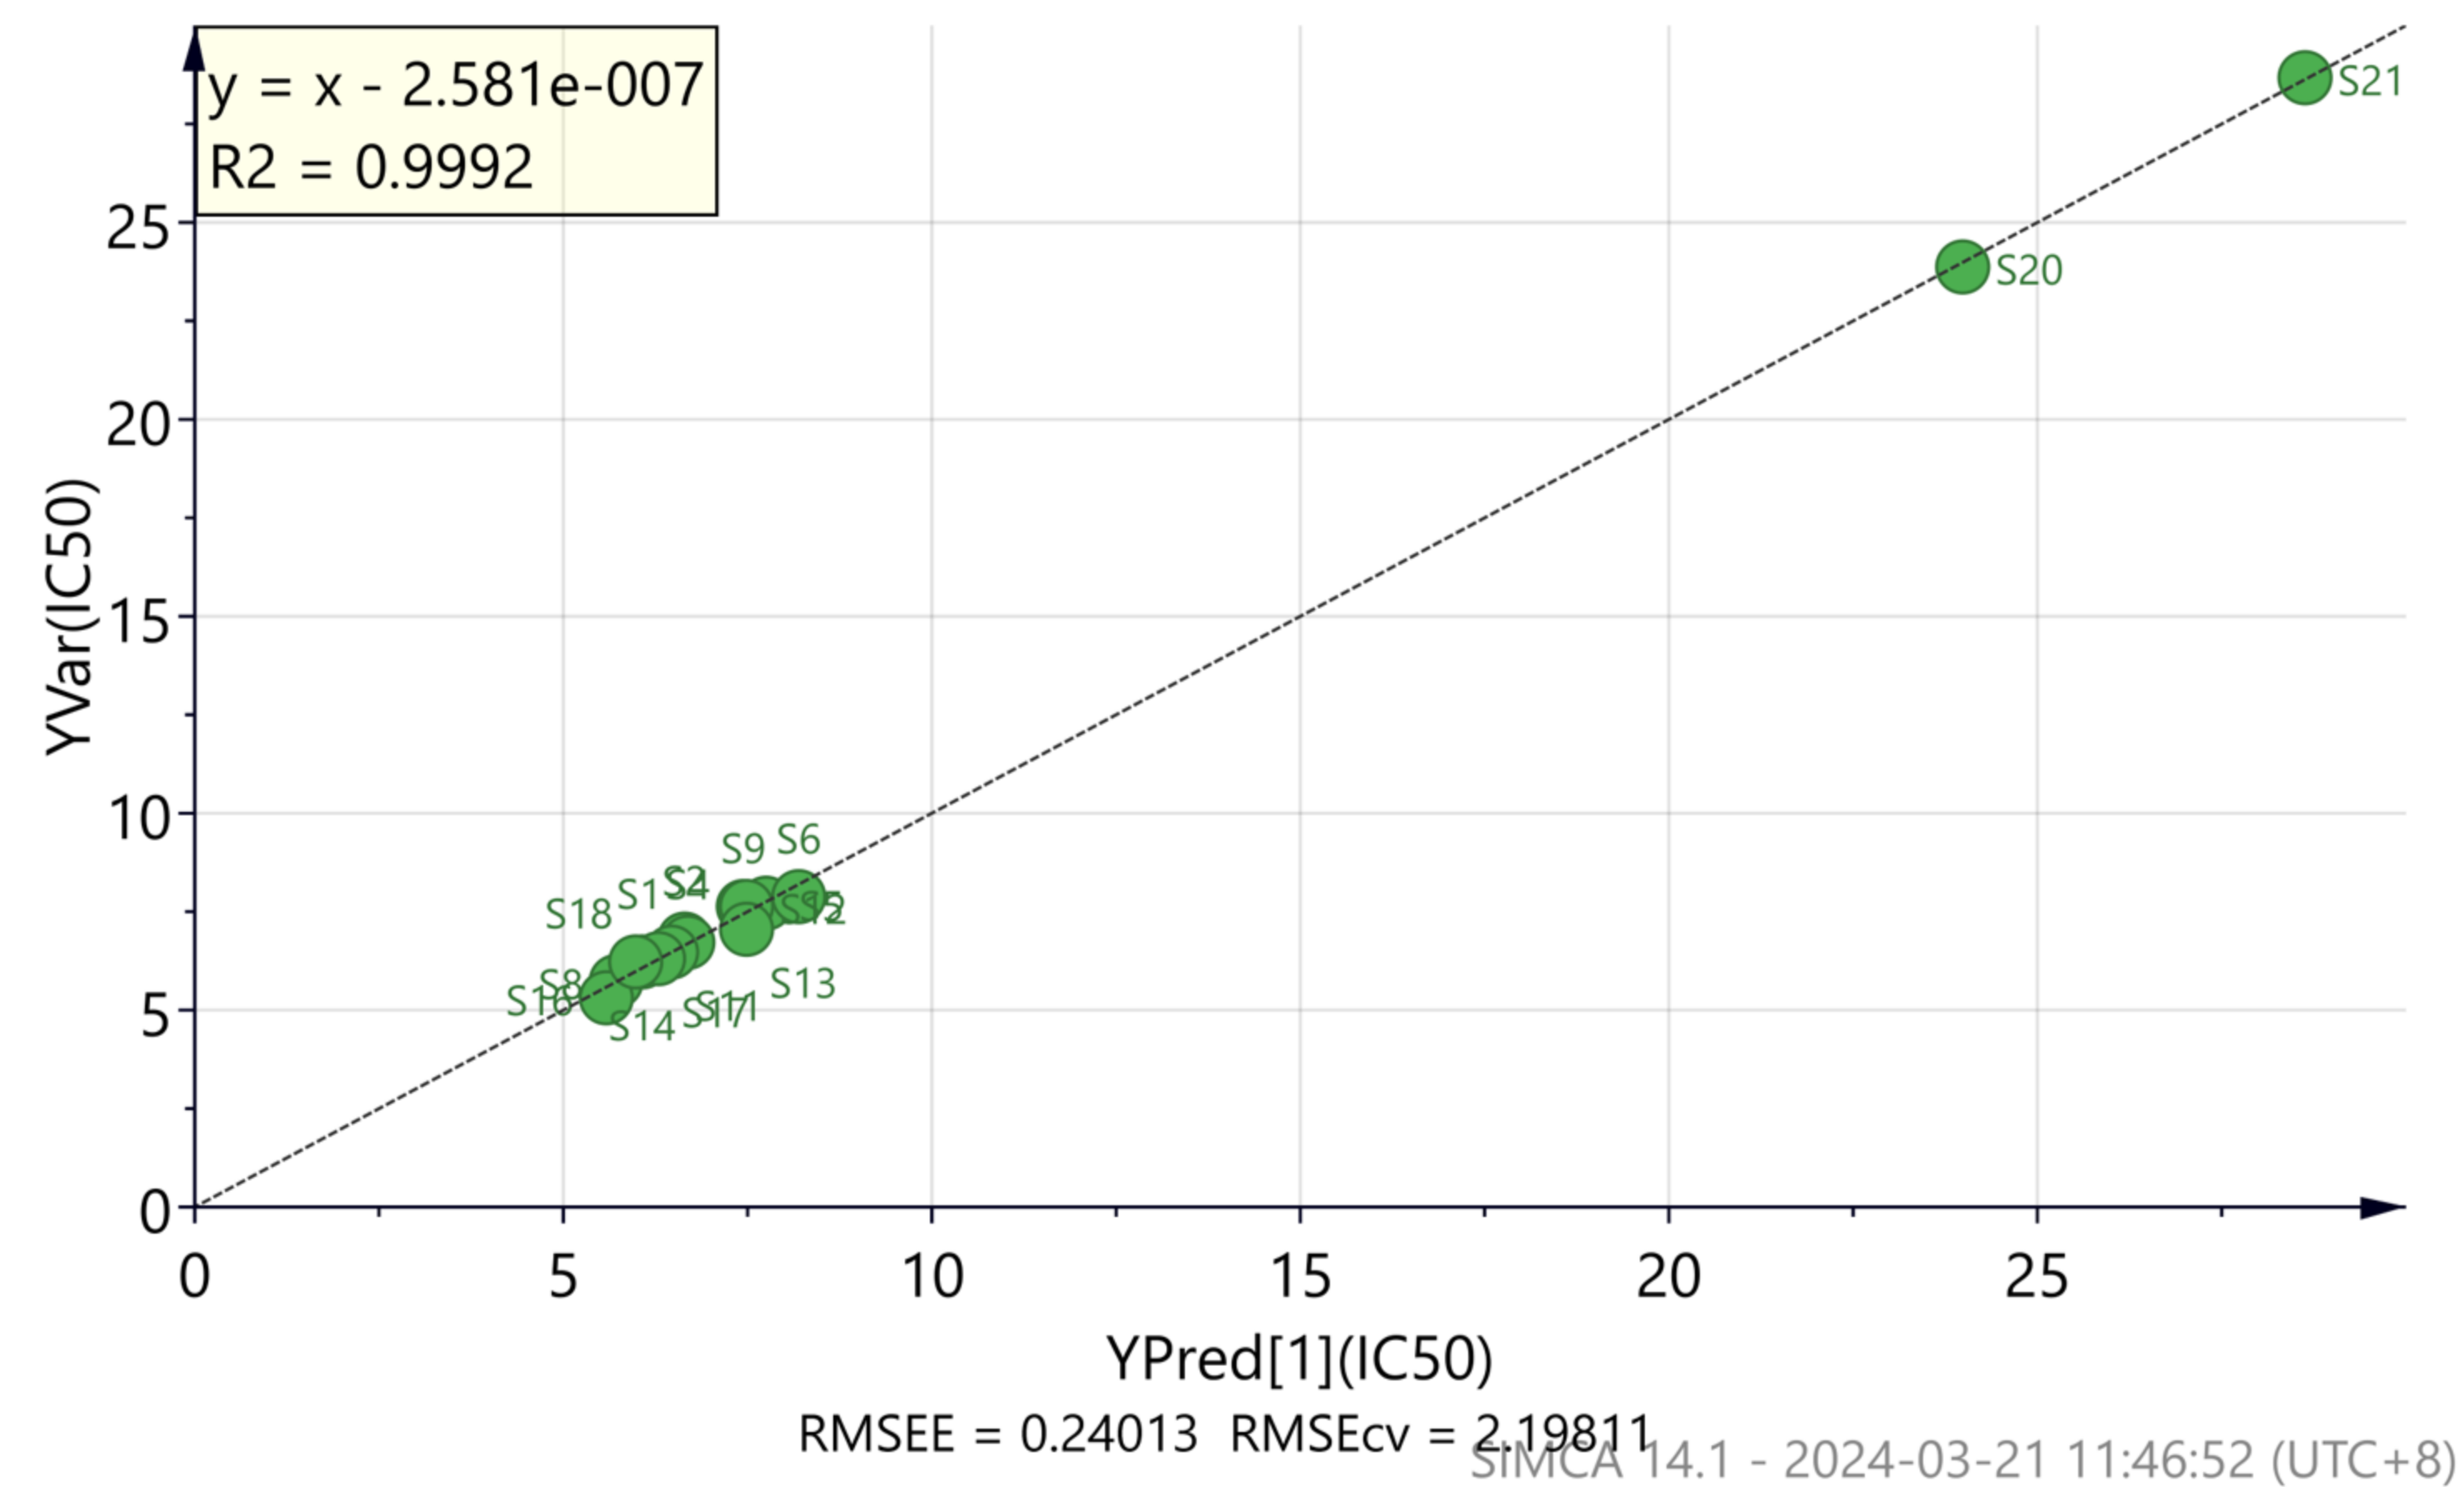

**F**

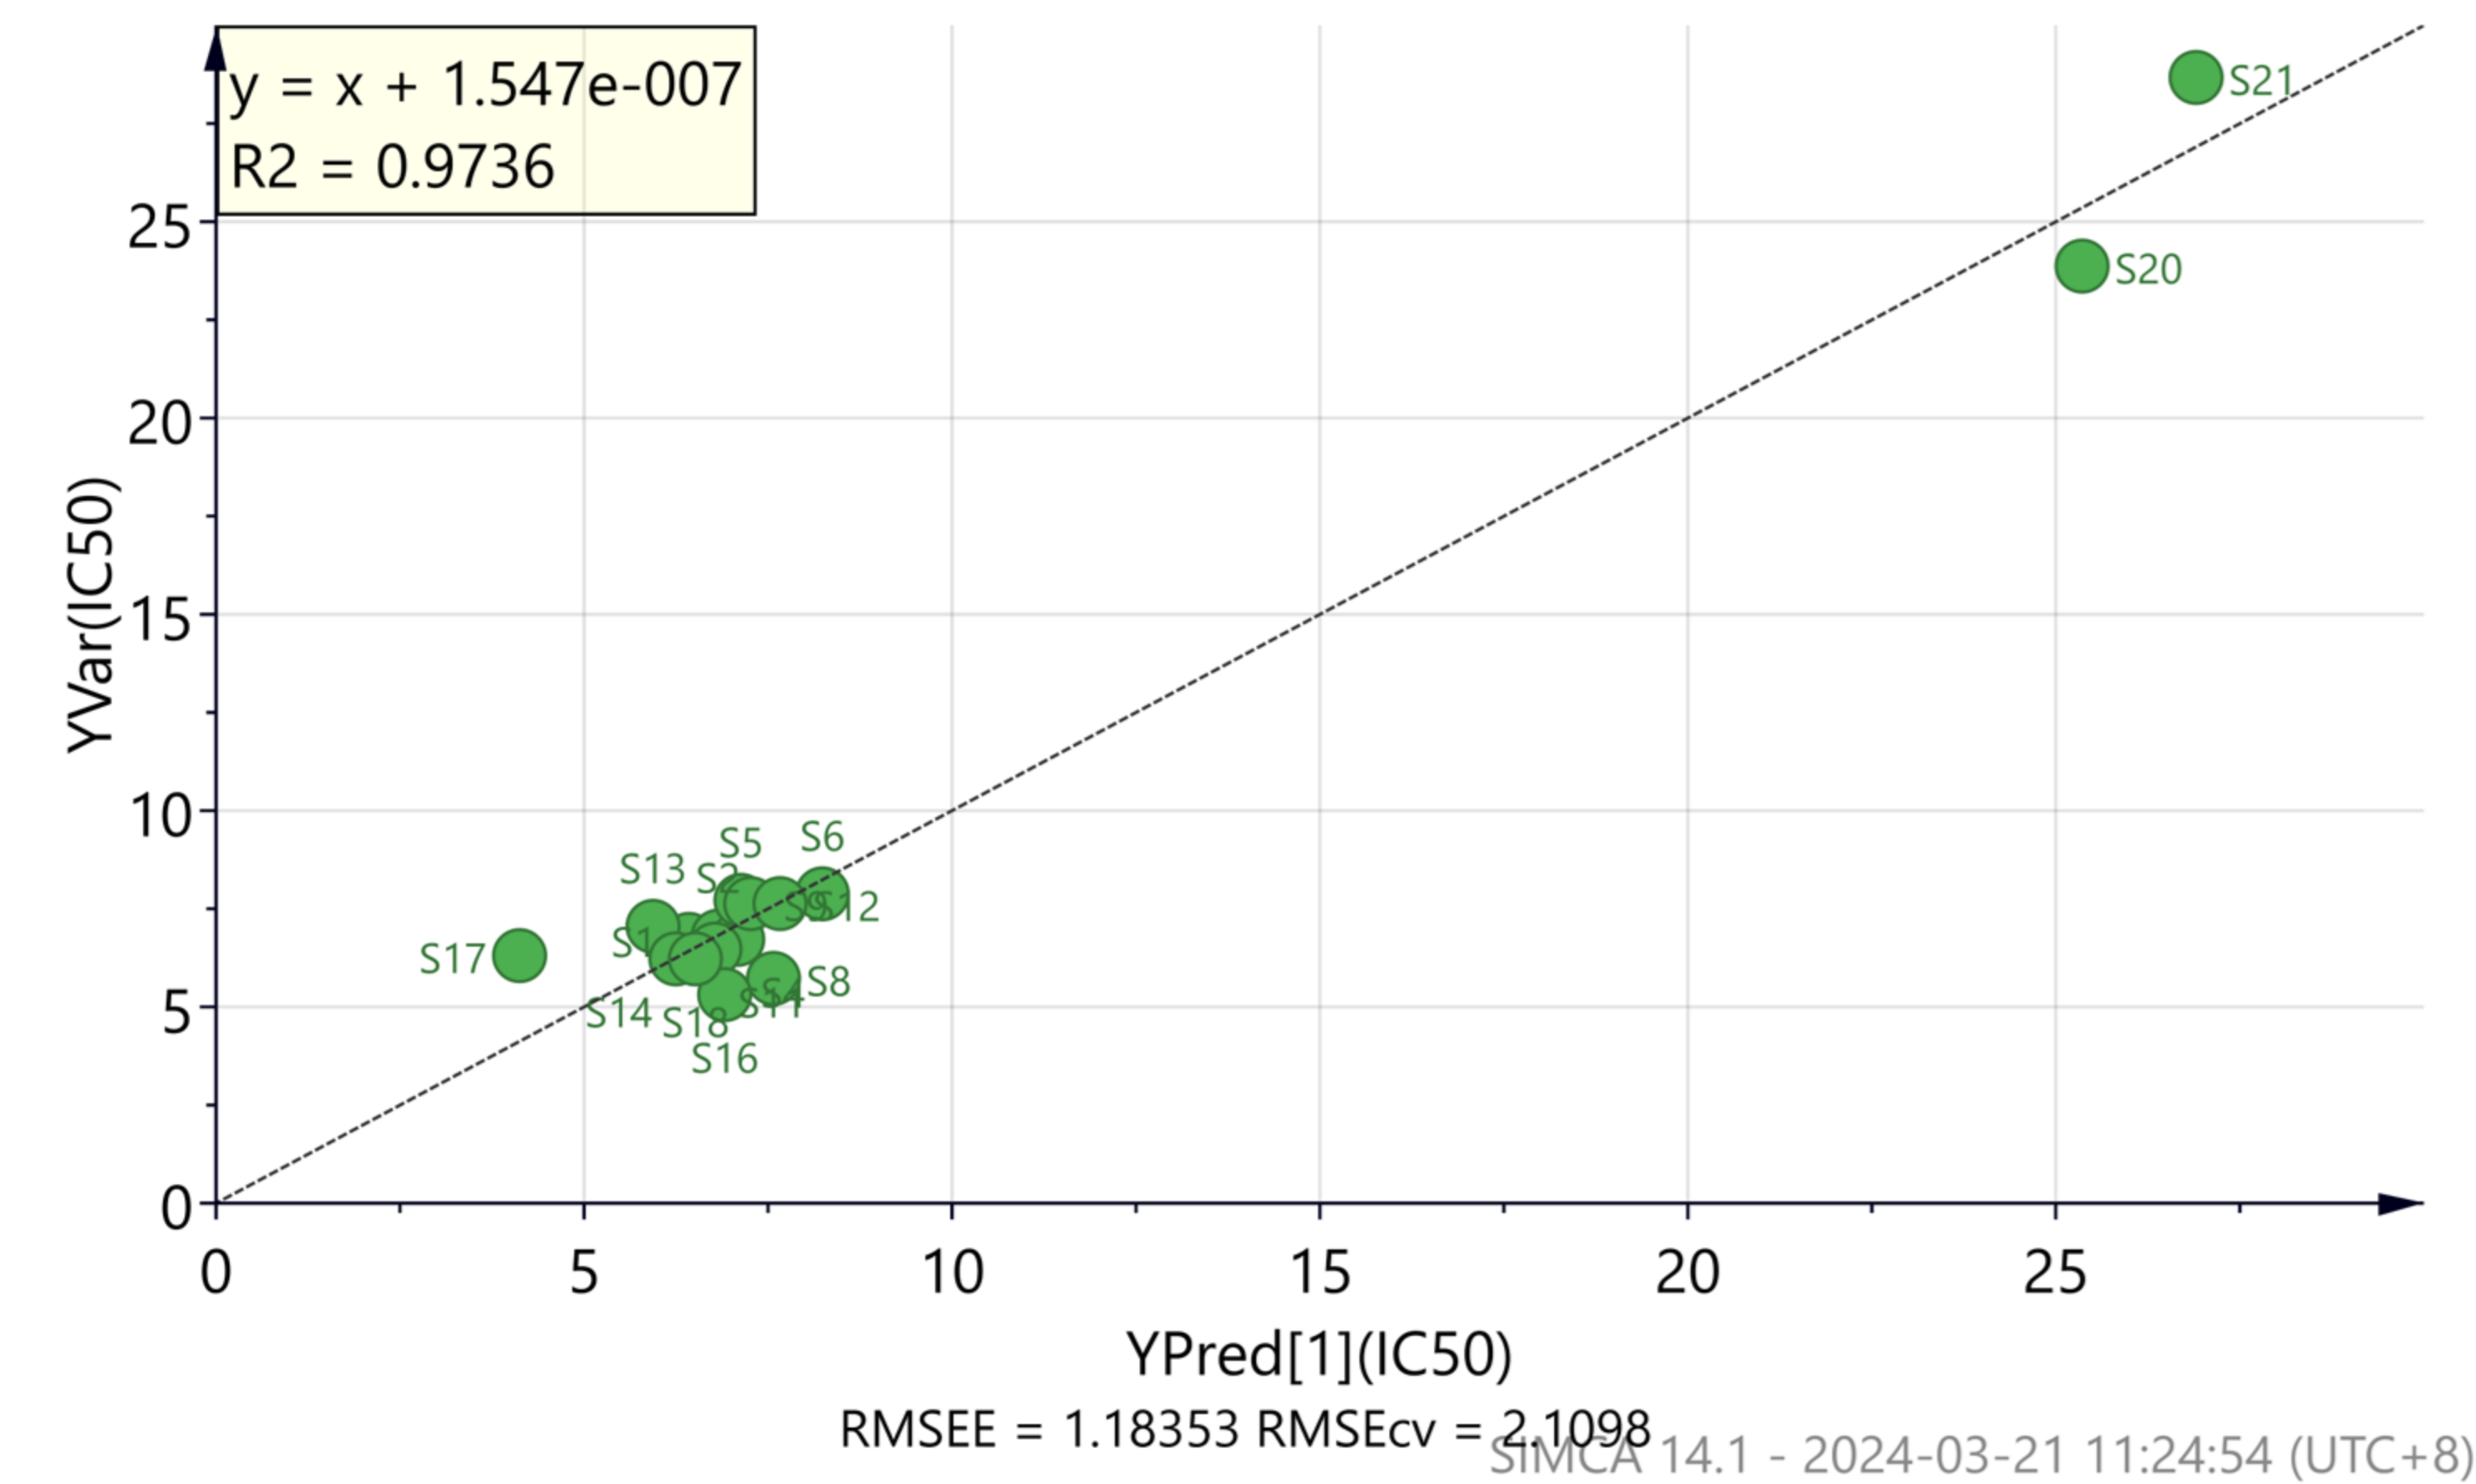

**Fig. S3.** The validation set of peak areas and IC<sub>50</sub> value correlations for FT-IR (A), UV (B) and HPLC (C). The training set of peak areas and IC<sub>50</sub> value correlations for FT-IR (D), UV (E) and HPLC (F).
