# Supplementary figures and images for: A rapid evaluation method for the quality consistency assessment and spectrum–effect relationship study of Xiaohuoluo Pills developed based on combined spectral and chromatography technology
Source: Royal Society of Chemistry journal article supplement (doi:10.1039/d4ay01029a), 2024-01-01

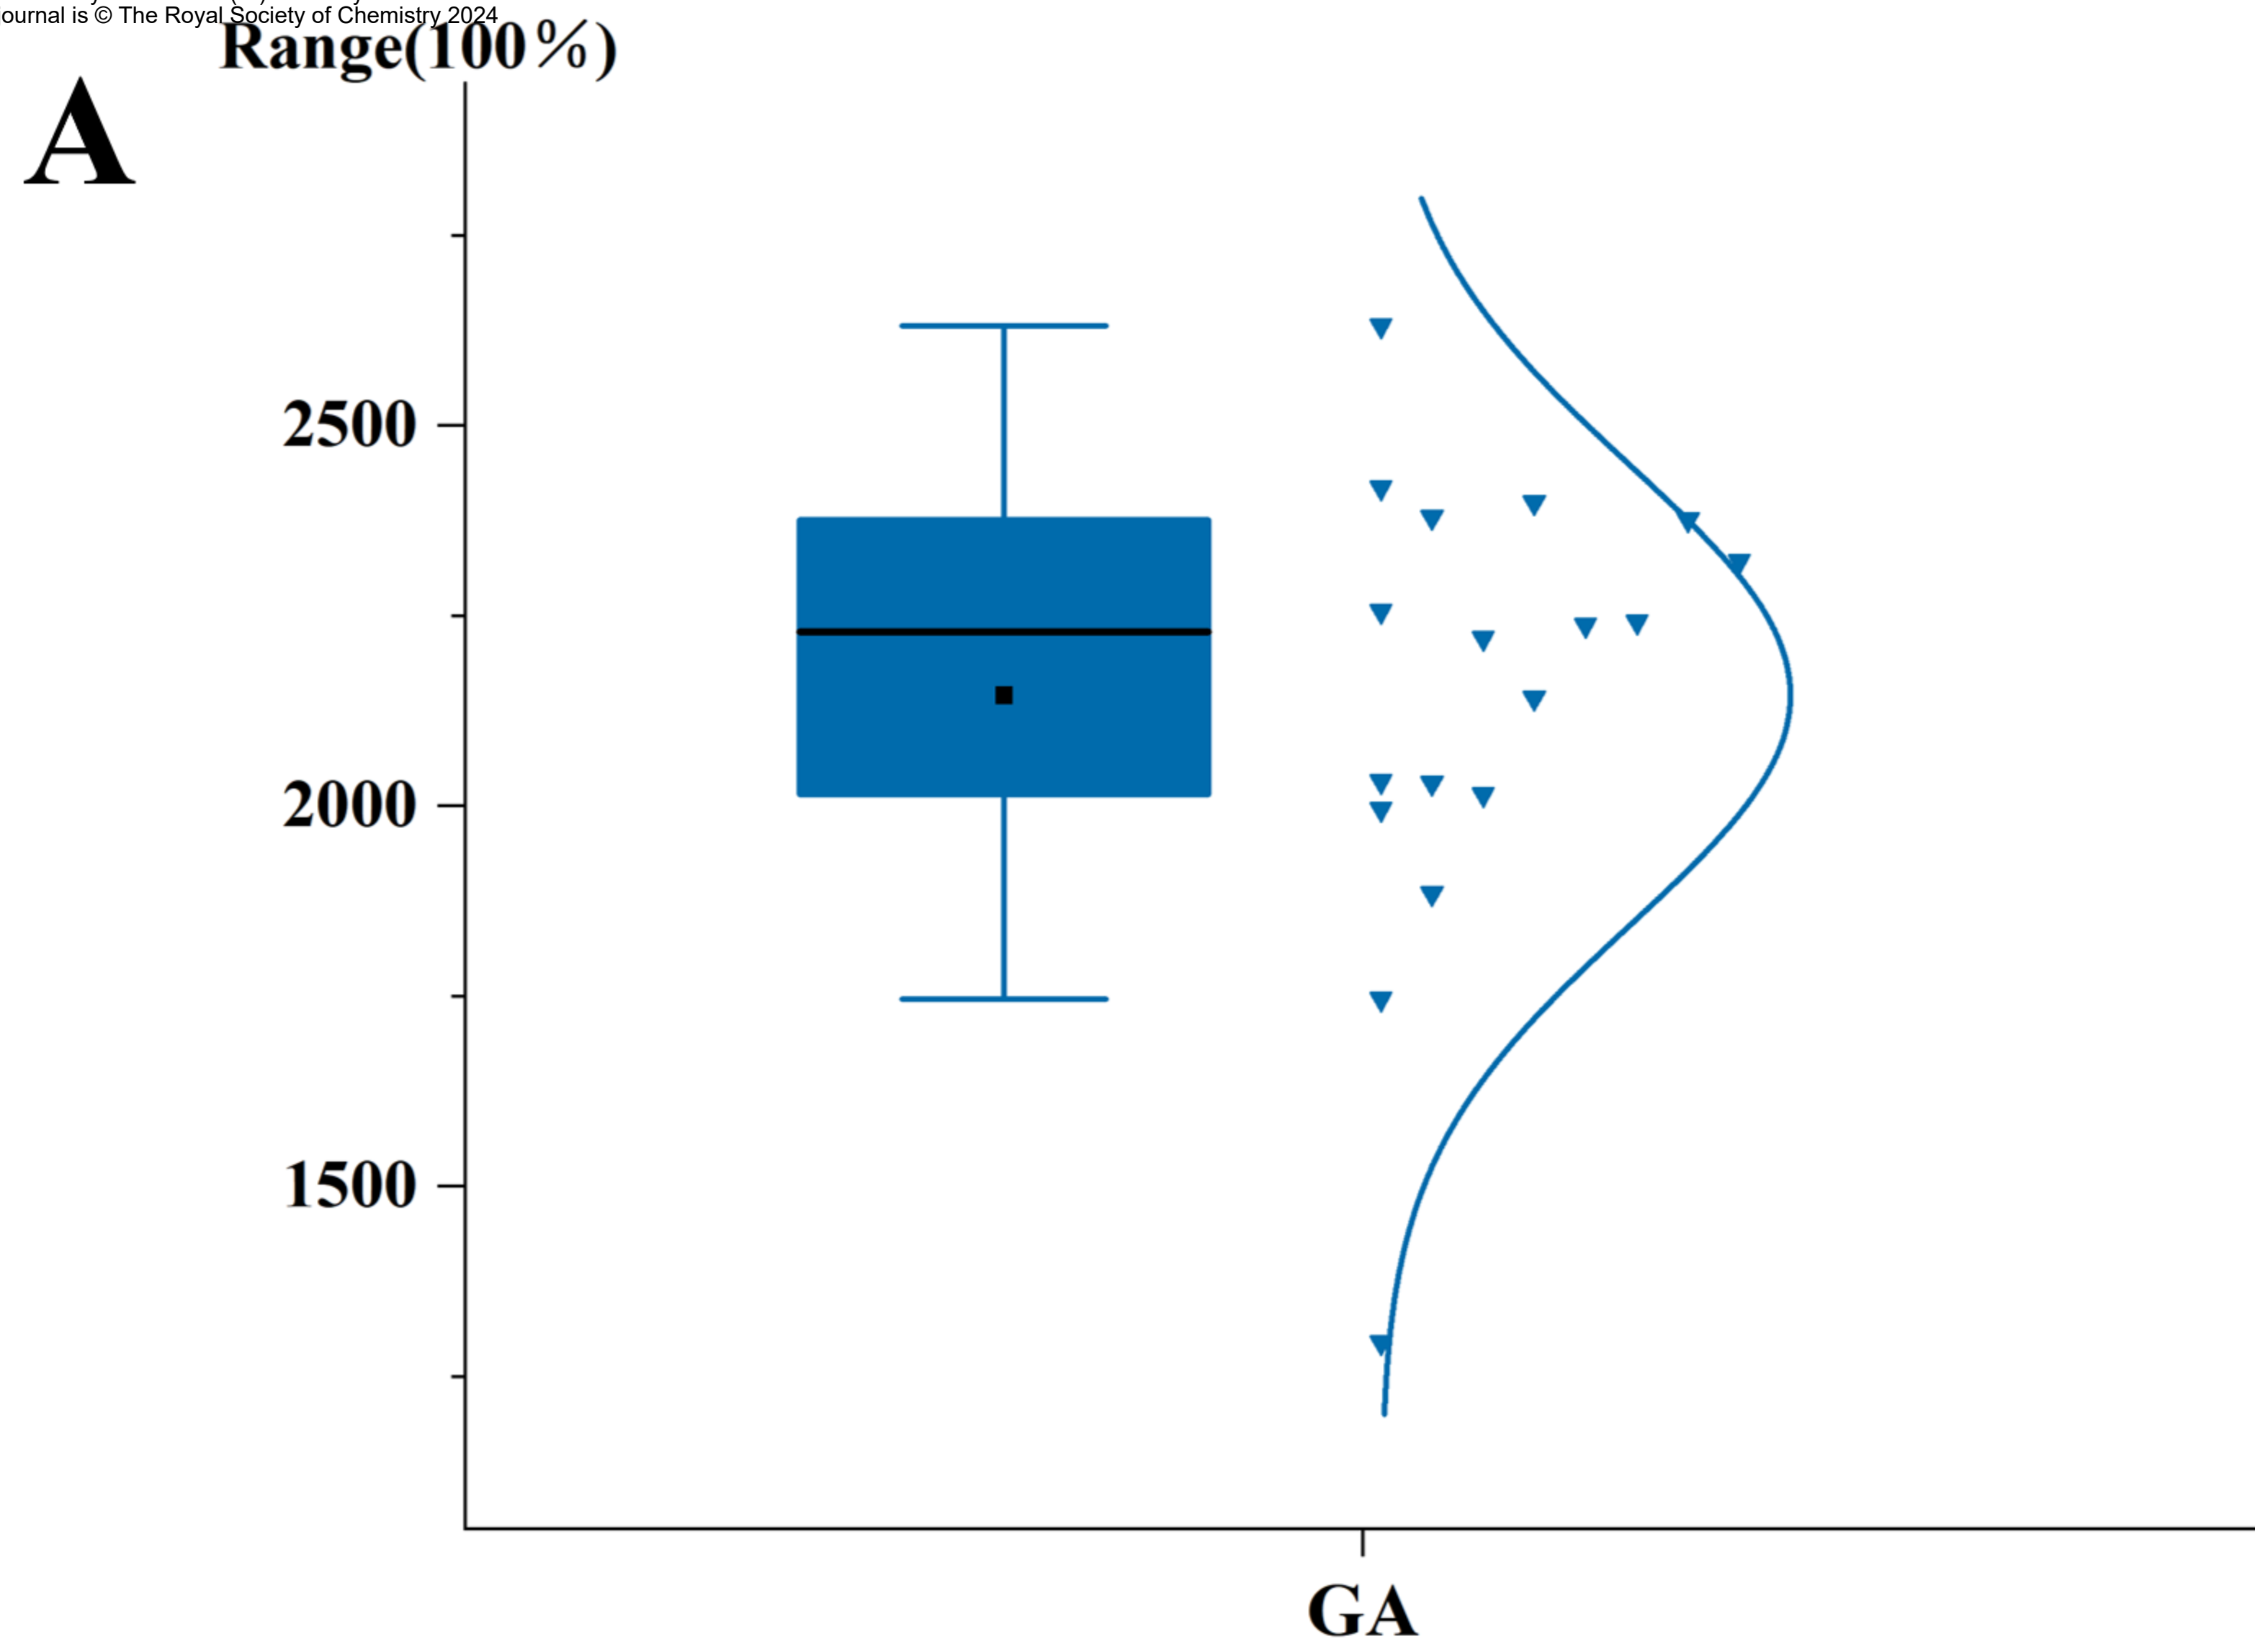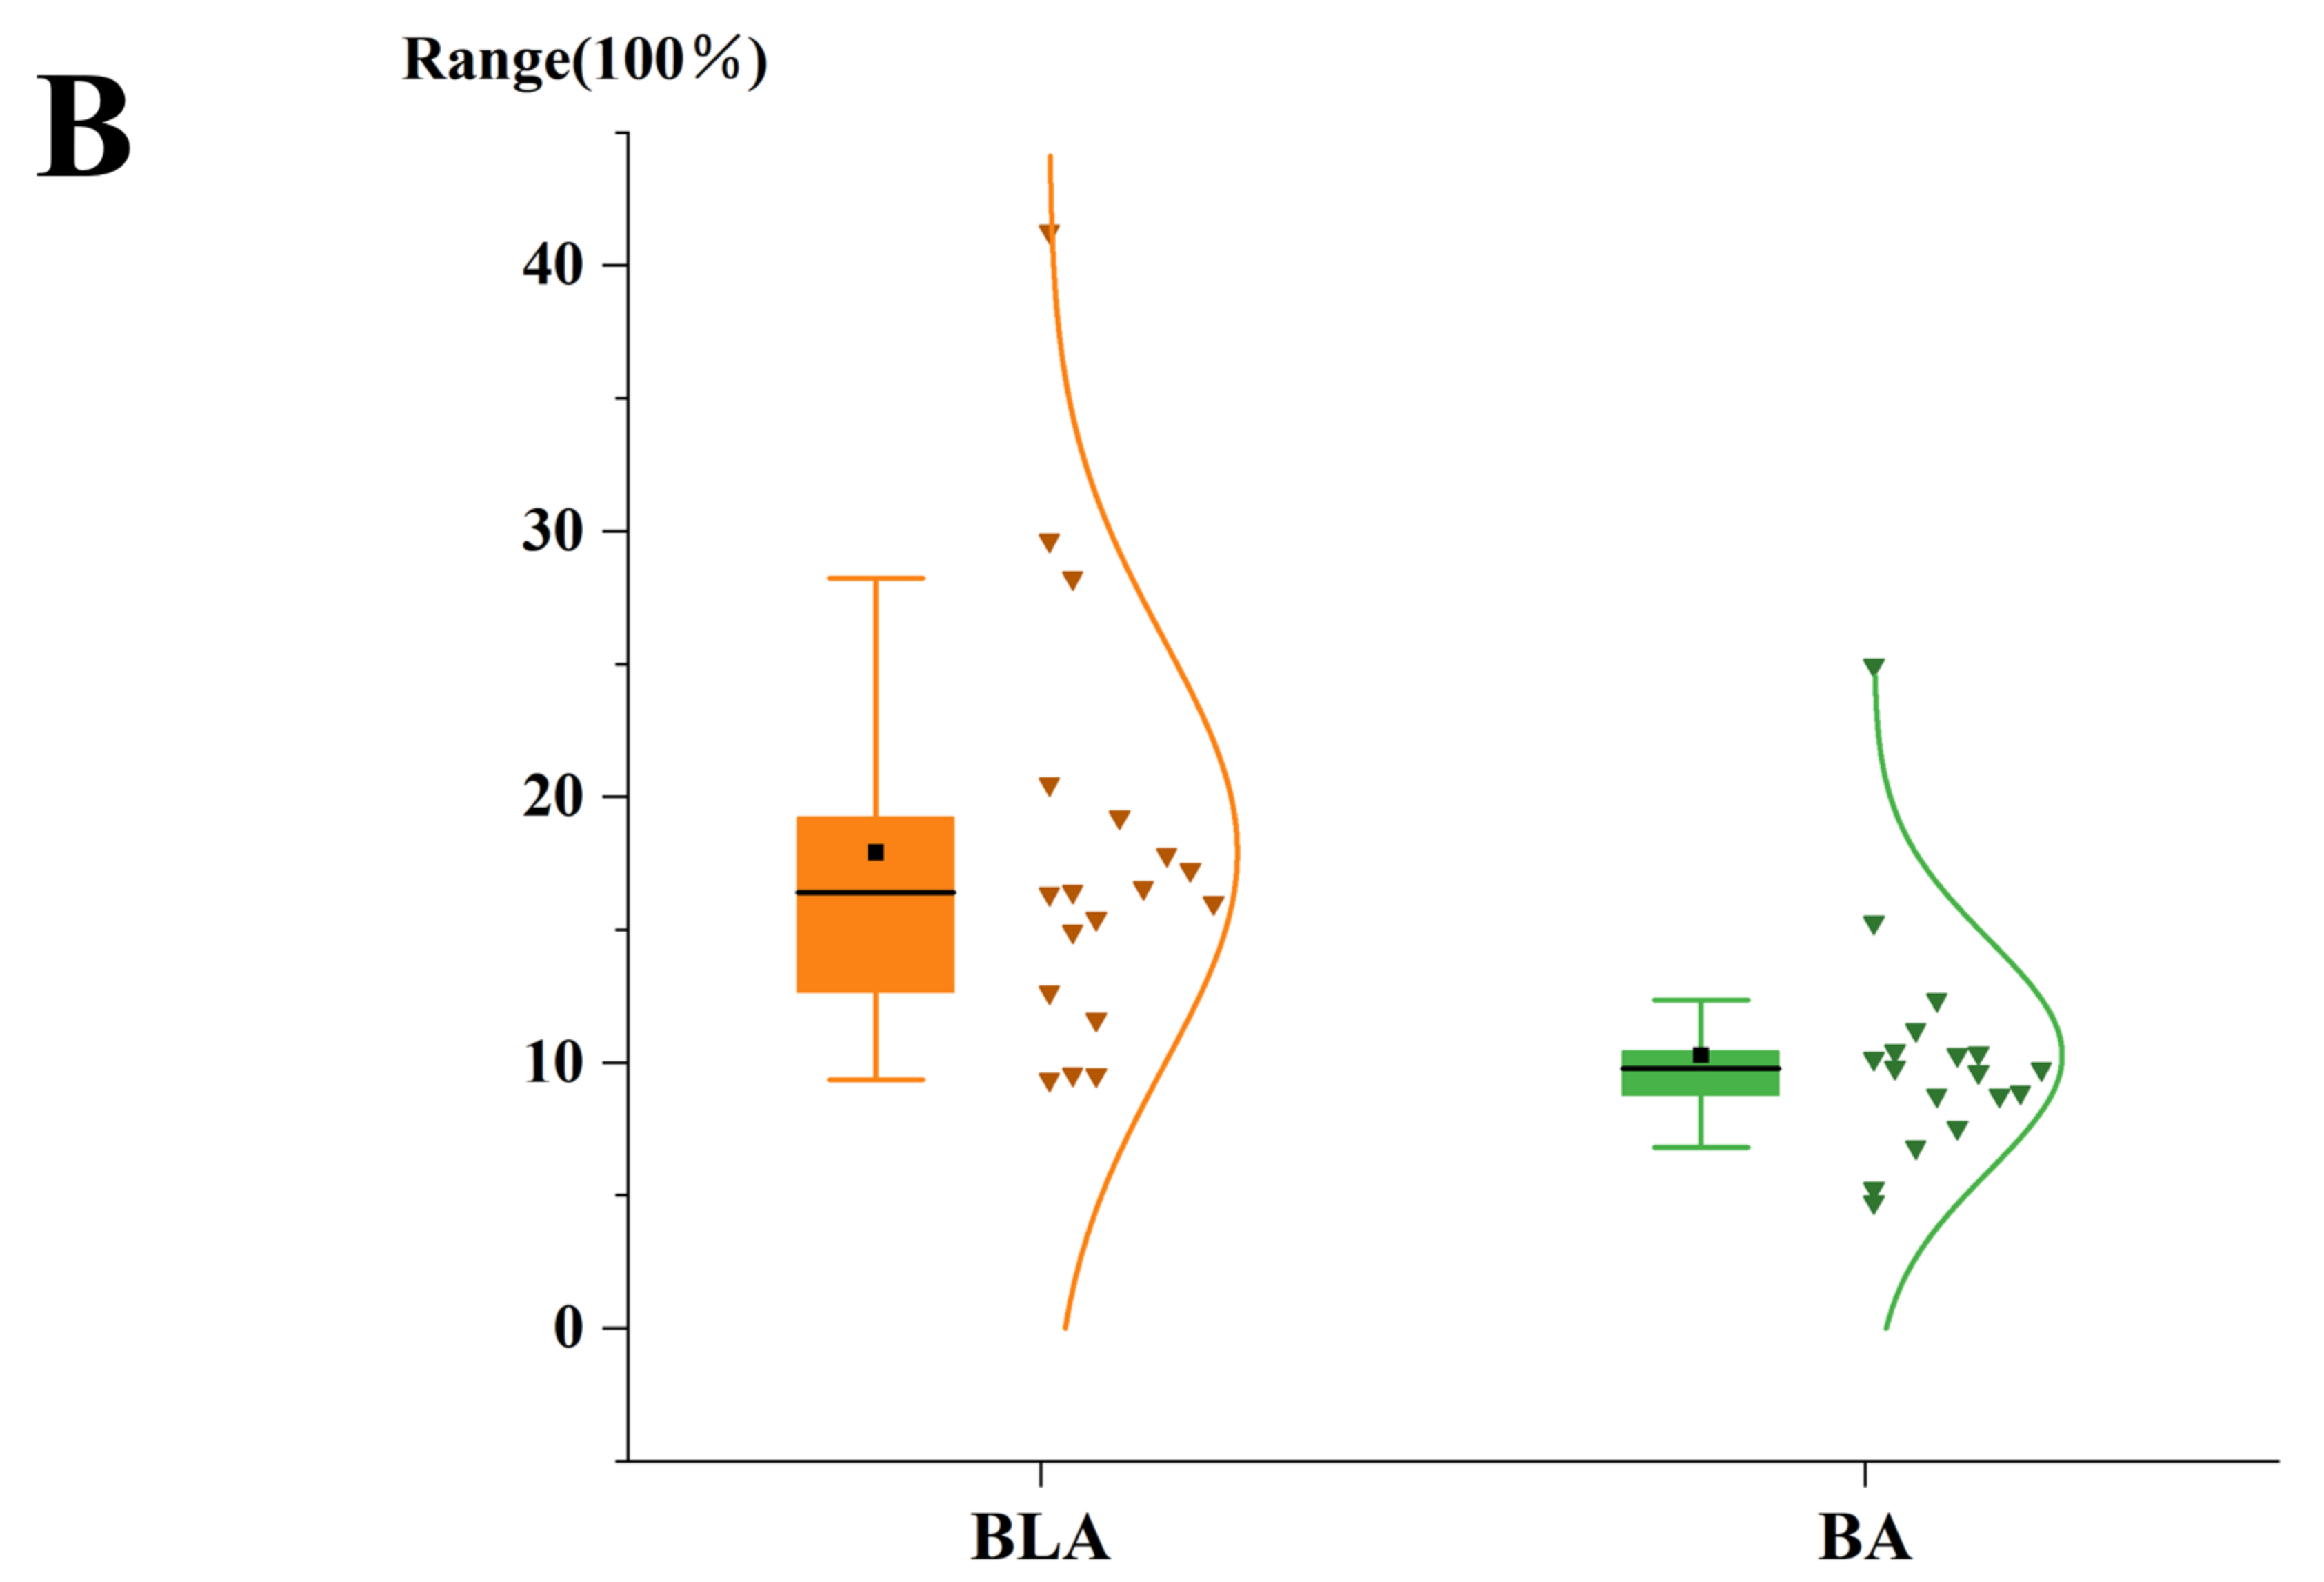

**Fig. S1.** Box plot of the content fluctuation of the three compounds(A-B).

Supplement: d4ay01029a1.pdf [file d4ay01029a1.pdf]
